# Supplementary material
Source: PubMed Central journal article supplement (PMC3192481)
Supplement: supp_111.020289_ajcn020289-file001.pdf [file supp_111.020289_ajcn020289-file001.pdf]

Supplemental Table 1. Dietary intakes of selected mineral among users and non-users of dietary supplements by the Dietary Reference Intake age groups and gender among U.S. adults, 2003-2006.

|   |         | Usual Intake - Calcium (mg)   |      |      |                  |      |       | Usual Intake - Iron (mg) |      |       |                  |      |        |
|---|---------|-------------------------------|------|------|------------------|------|-------|--------------------------|------|-------|------------------|------|--------|
|   |         | <u>Users</u>                  |      |      | <u>Non-Users</u> |      |       | <u>Users</u>             |      |       | <u>Non-Users</u> |      |        |
|   | Age (y) | N                             | Mean | ± SE | N                | Mean | ± SE  | N                        | Mean | ± SE  | N                | Mean | ± SE   |
| M | 19+     | 1782                          | 1058 | ± 22 | 2777             | 1005 | ± 21  | 807                      | 19.8 | ± 0.5 | 3752             | 18.5 | ± 0.2  |
|   | 19-30   | 285                           | 1136 | ± 59 | 812              | 1090 | ± 36  | 158                      | 21.7 | ± 0.8 | 939              | 19.8 | ± 0.5  |
|   | 31-50   | 556                           | 1132 | ± 30 | 883              | 1033 | ± 35  | 285                      | 20.2 | ± 0.6 | 1154             | 19.1 | ± 0.3  |
|   | 51-70   | 534                           | 981  | ± 29 | 681              | 897  | ± 24  | 205                      | 18.4 | ± 0.9 | 1010             | 17.2 | ± 0.4  |
|   | 71+     | 407                           | 924  | ± 31 | 401              | 887  | ± 28  | 159                      | 17.1 | ± 0.7 | 649              | 16.3 | ± 0.3  |
| F | 19+     | 2109                          | 843  | ± 16 | 2192             | 727  | ± 12* | 1102                     | 14.1 | ± 0.3 | 3199             | 13.0 | ± 0.2* |
|   | 19-30   | 274                           | 933  | ± 39 | 639              | 717  | ± 26* | 215                      | 14.9 | ± 0.8 | 698              | 12.9 | ± 0.4  |
|   | 31-50   | 597                           | 864  | ± 25 | 753              | 760  | ± 17* | 379                      | 14.4 | ± 0.4 | 971              | 13.2 | ± 0.4  |
|   | 51-70   | 746                           | 804  | ± 20 | 505              | 698  | ± 27* | 309                      | 13.5 | ± 0.4 | 942              | 13.0 | ± 0.4  |
|   | 71+     | 492                           | 802  | ± 23 | 295              | 680  | ± 26* | 199                      | 13.4 | ± 0.6 | 588              | 12.6 | ± 0.4  |
|   |         | Usual Intake - Magnesium (mg) |      |      |                  |      |       | Usual Intake - Zinc (mg) |      |       |                  |      |        |
|   |         | <u>Users</u>                  |      |      | <u>Non-Users</u> |      |       | <u>Users</u>             |      |       | <u>Non-Users</u> |      |        |
|   | Age (y) | N                             | Mean | ± SE | N                | Mean | ± SE  | N                        | Mean | ± SE  | N                | Mean | ± SE   |
| M | 19+     | 1459                          | 350  | ± 5  | 1592             | 268  | ± 5*  | 1369                     | 15.0 | ± 0.2 | 3190             | 14.5 | ± 0.2  |
|   | 19-30   | 228                           | 358  | ± 13 | 212              | 254  | ± 13* | 209                      | 16.6 | ± 0.3 | 888              | 15.0 | ± 0.4* |
|   | 31-50   | 441                           | 373  | ± 9  | 446              | 284  | ± 8*  | 403                      | 15.8 | ± 0.2 | 1036             | 15.3 | ± 0.3  |
|   | 51-70   | 458                           | 339  | ± 10 | 567              | 269  | ± 7*  | 427                      | 14.4 | ± 0.3 | 788              | 13.4 | ± 0.3  |

|   |       |      |     |   |    |      |     |   |    |      |      |   |     |      |      |   |      |
|---|-------|------|-----|---|----|------|-----|---|----|------|------|---|-----|------|------|---|------|
|   | 71+   | 332  | 296 | ± | 8  | 367  | 243 | ± | 7* | 330  | 12.2 | ± | 0.3 | 478  | 12.3 | ± | 0.4  |
| F | 19+   | 1459 | 350 | ± | 5  | 3100 | 327 | ± | 5* | 1545 | 10.6 | ± | 0.2 | 2756 | 9.5  | ± | 0.2* |
|   | 19-30 | 228  | 358 | ± | 13 | 869  | 328 | ± | 10 | 218  | 10.8 | ± | 0.4 | 695  | 9.5  | ± | 0.3  |
|   | 31-50 | 441  | 373 | ± | 9  | 998  | 351 | ± | 7  | 417  | 11.2 | ± | 0.3 | 933  | 9.9  | ± | 0.2* |
|   | 51-70 | 458  | 339 | ± | 10 | 757  | 306 | ± | 8  | 541  | 10.5 | ± | 0.2 | 710  | 9.3  | ± | 0.3* |
|   | 71+   | 332  | 296 | ± | 8  | 476  | 269 | ± | 6  | 369  | 9.6  | ± | 0.3 | 418  | 8.6  | ± | 0.3  |

|   |         | Usual Intake - Phosphorus (mg) |      |   |                  |      | Usual Intake - Copper (mg) |   |     |                  |      |   |     |      |     |   |      |
|---|---------|--------------------------------|------|---|------------------|------|----------------------------|---|-----|------------------|------|---|-----|------|-----|---|------|
|   |         | <u>Users</u>                   |      |   | <u>Non-Users</u> |      | <u>Users</u>               |   |     | <u>Non-Users</u> |      |   |     |      |     |   |      |
|   | Age (y) | N                              | Mean | ± | SE               | N    | Mean                       | ± | SE  | N                | Mean | ± | SE  |      |     |   |      |
| M | 19+     | 959                            | 1596 | ± | 27               | 3600 | 1564                       | ± | 19  | 1302             | 1.6  | ± | 0.0 | 3257 | 1.5 | ± | 0.0  |
|   | 19-30   | 137                            | 1712 | ± | 74               | 960  | 1626                       | ± | 34  | 203              | 1.6  | ± | 0.1 | 894  | 1.4 | ± | 0.0* |
|   | 31-50   | 273                            | 1739 | ± | 32               | 1166 | 1651                       | ± | 30  | 382              | 1.7  | ± | 0.0 | 1057 | 1.6 | ± | 0.0  |
|   | 51-70   | 306                            | 1496 | ± | 47               | 909  | 1458                       | ± | 24  | 409              | 1.5  | ± | 0.1 | 806  | 1.4 | ± | 0.0  |
|   | 71+     | 243                            | 1301 | ± | 34               | 565  | 1298                       | ± | 30  | 308              | 1.3  | ± | 0.0 | 500  | 1.3 | ± | 0.0  |
| F | 19+     | 984                            | 1176 | ± | 21               | 3317 | 1096                       | ± | 13* | 1281             | 1.2  | ± | 0.0 | 3020 | 1.1 | ± | 0.0* |
|   | 19-30   | 99                             | 1281 | ± | 59               | 814  | 1100                       | ± | 24  | 149              | 1.2  | ± | 0.0 | 764  | 1.0 | ± | 0.0  |
|   | 31-50   | 231                            | 1273 | ± | 42               | 1119 | 1128                       | ± | 17* | 319              | 1.3  | ± | 0.0 | 1031 | 1.1 | ± | 0.0* |
|   | 51-70   | 374                            | 1139 | ± | 23               | 877  | 1079                       | ± | 26  | 471              | 1.2  | ± | 0.0 | 780  | 1.1 | ± | 0.0* |
|   | 71+     | 280                            | 1046 | ± | 24               | 507  | 1002                       | ± | 18  | 342              | 1.1  | ± | 0.0 | 445  | 1.0 | ± | 0.0  |

|   |       | Usual Intake - Potassium (mg) |      |       |           |      | Usual Intake - Selenium (mcg) |       |  |      |           |       |  |
|---|-------|-------------------------------|------|-------|-----------|------|-------------------------------|-------|--|------|-----------|-------|--|
|   |       | Users                         |      |       | Non-Users |      |                               | Users |  |      | Non-Users |       |  |
|   |       | N                             | Mean | ± SE  |           | N    | Mean                          | ± SE  |  | N    | Mean      | ± SE  |  |
| M | 19+   | 1178                          | 3247 | ± 60  |           | 3381 | 3047                          | ± 30* |  | 1275 | 132.7     | ± 1.9 |  |
|   | 19-30 | 178                           | 3098 | ± 107 |           | 919  | 2894                          | ± 45  |  | 188  | 150.9     | ± 4.4 |  |
|   | 31-50 | 351                           | 3373 | ± 77  |           | 1088 | 3228                          | ± 50  |  | 374  | 144.4     | ± 3.2 |  |
|   | 51-70 | 378                           | 3305 | ± 100 |           | 837  | 3014                          | ± 53  |  | 410  | 123.0     | ± 3.0 |  |
|   | 71+   | 271                           | 2889 | ± 76  |           | 537  | 2830                          | ± 62  |  | 303  | 101.2     | ± 3.5 |  |
| F | 19+   | 1093                          | 2530 | ± 43  |           | 3208 | 2245                          | ± 25* |  | 1218 | 95.2      | ± 1.6 |  |
|   | 19-30 | 103                           | 2352 | ± 153 |           | 810  | 2054                          | ± 45  |  | 135  | 99.4      | ± 4.6 |  |
|   | 31-50 | 260                           | 2555 | ± 86  |           | 1090 | 2325                          | ± 28  |  | 298  | 97.7      | ± 2.9 |  |
|   | 51-70 | 430                           | 2618 | ± 59  |           | 821  | 2281                          | ± 47* |  | 463  | 96.8      | ± 2.3 |  |
|   | 71+   | 300                           | 2374 | ± 70  |           | 487  | 2264                          | ± 41  |  | 322  | 84.1      | ± 1.9 |  |

\* Significantly different at a Bonferroni-adjusted p-value  $\leq 0.003$ .

Supplemental Table 2 The prevalence (SE) of inadequate intakes as assessed using the Estimated Average Requirement (EAR) among adults (> 19 y) in the U.S., 2003-2006<sup>1,2</sup>

|          |                | <i>Calcium</i>   |           |            |             |           |             | <i>Iron</i> |                |             |           |             |             |           |             |
|----------|----------------|------------------|-----------|------------|-------------|-----------|-------------|-------------|----------------|-------------|-----------|-------------|-------------|-----------|-------------|
|          |                | User             |           |            | Non-User    |           |             |             |                | User        |           |             | Non-User    |           |             |
|          | Age (y)        | N                | %         | (SE)       | N           | %         | (SE)        | Age (y)     | N              | %           | (SE)      | N           | %           | (SE)      |             |
| <b>M</b> | <b>All 19+</b> | <b>1782</b>      | <b>30</b> | <b>(2)</b> | <b>2777</b> | <b>36</b> | <b>(2)</b>  | <b>M</b>    | <b>All 19+</b> | <b>807</b>  | <b>-</b>  | <b>3752</b> | <b>-</b>    |           |             |
|          | 19-30          | 285              | 20        | (5)        | 812         | 26        | (3)         |             | 19-30          | 158         | 0         | (0)         | 939         | 0         | (0)         |
|          | 31-50          | 556              | 21        | (3)        | 883         | 31        | (3)         |             | 31-50          | 285         | 0         | (0)         | 1154        | 0         | (0)         |
|          | 51-70          | 534              | 34        | (3)        | 681         | 45        | (3)         |             | 51-70          | 205         | 0         | (0)         | 1010        | 0         | (0)         |
|          | 71+            | 407              | 64        | (4)        | 401         | 67        | (3)         |             | 71+            | 159         | 0         | (0)         | 649         | 0.2       | (0.1)       |
| <b>F</b> | <b>All 19+</b> | <b>2109</b>      | <b>61</b> | <b>(2)</b> | <b>2192</b> | <b>71</b> | <b>(2)*</b> | <b>F</b>    | <b>All 19+</b> | <b>1102</b> | <b>13</b> | <b>(1)</b>  | <b>3199</b> | <b>16</b> | <b>(1)*</b> |
|          | 19-30          | 274              | 39        | (5)        | 639         | 67        | (4)*        |             | 19-30          | 215         | 11        | (2)         | 698         | 18        | (1)*        |
|          | 31-50          | 597              | 47        | (3)        | 753         | 61        | (3)*        |             | 31-50          | 379         | 12        | (1)         | 971         | 16        | (1)         |
|          | 51-70          | 746              | 77        | (2)        | 505         | 88        | (2)*        |             | 51-70          | 309         | 16        | (2)         | 942         | 16        | (1)         |
|          | 71+            | 492              | 77        | (3)        | 295         | 89        | (2)*        |             | 71+            | 199         | 15        | (2)         | 588         | 17        | (1)         |
|          |                | <i>Magnesium</i> |           |            |             |           |             | <i>Zinc</i> |                |             |           |             |             |           |             |
|          |                | User             |           |            | Non-User    |           |             |             |                | User        |           |             | Non-User    |           |             |
|          | Age (y)        | N                | %         | (SE)       | N           | %         | (SE)        | Age (y)     | N              | %           | (SE)      | N           | %           | (SE)      |             |
| <b>M</b> | <b>All 19+</b> | <b>1459</b>      | <b>53</b> | <b>(2)</b> | <b>3100</b> | <b>63</b> | <b>(2)*</b> | <b>M</b>    | <b>All 19+</b> | <b>1369</b> | <b>9</b>  | <b>(1)</b>  | <b>3190</b> | <b>10</b> | <b>(1)</b>  |
|          | 19-30          | 228              | 46        | (4)        | 869         | 62        | (3)*        |             | 19-30          | 209         | 4         | (1)         | 888         | 8         | (2)         |
|          | 31-50          | 441              | 48        | (3)        | 998         | 57        | (2)         |             | 31-50          | 403         | 6         | (2)         | 1036        | 6         | (1)         |
|          | 51-70          | 458              | 57        | (4)        | 757         | 71        | (3)         |             | 51-70          | 427         | 10        | (2)         | 788         | 15        | (2)         |
|          | 71+            | 332              | 74        | (3)        | 476         | 80        | (2)         |             | 71+            | 330         | 24        | (3)         | 478         | 22        | (3)         |
| <b>F</b> | <b>All 19+</b> | <b>1592</b>      | <b>52</b> | <b>(2)</b> | <b>2709</b> | <b>69</b> | <b>(2)*</b> | <b>F</b>    | <b>All 19+</b> | <b>1545</b> | <b>10</b> | <b>(1)</b>  | <b>2756</b> | <b>17</b> | <b>(1)*</b> |
|          | 19-30          | 212              | 55        | (4)        | 701         | 74        | (3)*        |             | 19-30          | 218         | 9         | (2)         | 695         | 17        | (3)         |
|          | 31-50          | 446              | 49        | (3)        | 904         | 64        | (2)*        |             | 31-50          | 417         | 7         | (2)         | 933         | 13        | (2)         |
|          | 51-70          | 567              | 53        | (3)        | 684         | 70        | (4)*        |             | 51-70          | 541         | 11        | (2)         | 710         | 19        | (4)         |

|  |     |     |    |     |     |    |      |  |     |     |    |     |     |    |     |
|--|-----|-----|----|-----|-----|----|------|--|-----|-----|----|-----|-----|----|-----|
|  | 71+ | 367 | 62 | (3) | 420 | 75 | (2)* |  | 71+ | 369 | 17 | (3) | 418 | 26 | (4) |
|--|-----|-----|----|-----|-----|----|------|--|-----|-----|----|-----|-----|----|-----|

*Phosphorus*

*Copper*

|          | Age (y)        | User       |          |              | Non-User    |          |             | Cu       | Age (y)        | User        |            |              | Non-User    |            |               |
|----------|----------------|------------|----------|--------------|-------------|----------|-------------|----------|----------------|-------------|------------|--------------|-------------|------------|---------------|
|          |                | N          | %        | (SE)         | N           | %        | (SE)        |          |                | N           | %          | (SE)         | N           | %          | (SE)          |
| <b>M</b> | <b>All 19+</b> | <b>959</b> | -        | -            | <b>3600</b> | -        | -           | <b>M</b> | <b>All 19+</b> | <b>1302</b> | <b>0.3</b> | <b>(0.1)</b> | <b>3257</b> | <b>1.4</b> | <b>(0.3)*</b> |
|          | 19-30          | 137        | 0        | (0)          | 960         | 0        | (0)         |          | 19-30          | 203         | 0          | (0)          | 894         | 2          | (1)           |
|          | 31-50          | 273        | 0        | (0)          | 1166        | 0        | (0)         |          | 31-50          | 382         | 0          | (0)          | 1057        | 1          | (0)           |
|          | 51-70          | 306        | 0        | (0)          | 909         | 0        | (0)         |          | 51-70          | 409         | 0          | (0)          | 806         | 2          | (1)           |
|          | 71+            | 243        | 0        | (0)          | 565         | 1        | (0)         |          | 71+            | 308         | 1          | (1)          | 500         | 3          | (1)           |
| <b>F</b> | <b>All 19+</b> | <b>984</b> | <b>2</b> | <b>(0.5)</b> | <b>3317</b> | <b>4</b> | <b>(1)*</b> | <b>F</b> | <b>All 19+</b> | <b>1281</b> | <b>5</b>   | <b>(1)</b>   | <b>3020</b> | <b>10</b>  | <b>(1)*</b>   |
|          | 19-30          | 99         | 1        | (1)          | 814         | 4        | (1)         |          | 19-30          | 149         | 6          | (2)          | 764         | 12         | (2)           |
|          | 31-50          | 231        | 1        | (0)          | 1119        | 3        | (1)         |          | 31-50          | 319         | 3          | (1)          | 1031        | 8          | (1)*          |
|          | 51-70          | 374        | 2        | (1)          | 877         | 4        | (1)         |          | 51-70          | 471         | 4          | (1)          | 780         | 10         | (2)           |
|          | 71+            | 280        | 4        | (1)          | 507         | 7        | (1)         |          | 71+            | 342         | 9          | (2)          | 445         | 15         | (2)           |

*Selenium*

|          | Age (y)        | User        |            |              | Non-User    |            |               |
|----------|----------------|-------------|------------|--------------|-------------|------------|---------------|
|          |                | N           | %          | (SE)         | N           | %          | (SE)          |
| <b>M</b> | <b>All 19+</b> | <b>1275</b> | -          | -            | <b>3284</b> | <b>0.1</b> | (0)           |
|          | 19-30          | 188         | 0          | (0)          | 909         | 0          | (0)           |
|          | 31-50          | 374         | 0          | (0)          | 1065        | 0          | (0)           |
|          | 51-70          | 410         | 0          | (0)          | 805         | 0.1        | (0.1)         |
|          | 71+            | 303         | 0          | (0)          | 505         | 0.5        | (0.2)         |
| <b>F</b> | <b>All 19+</b> | <b>1218</b> | <b>1.2</b> | <b>(0.5)</b> | <b>3083</b> | <b>2.4</b> | <b>(0.6)*</b> |
|          | 19-30          | 135         | 0.7        | (0.4)        | 778         | 2.0        | (0.6)         |
|          | 31-50          | 298         | 0.8        | (0.5)        | 1052        | 1.6        | (0.5)         |
|          | 51-70          | 463         | 0.9        | (0.4)        | 788         | 2.4        | (0.9)         |
|          | 71+            | 322         | 3.1        | (1.3)        | 465         | 5.2        | (1.2)         |
